# Supplementary figures and images for: Systematic Literature Review of Text Messaging Interventions to Promote Medication Adherence Among People With Serious Mental Illness
Source: Atypon-hosted journal article supplement (doi:10.1176/appi.ps.202100634), 2022-08-12

**CONSORT Diagram**

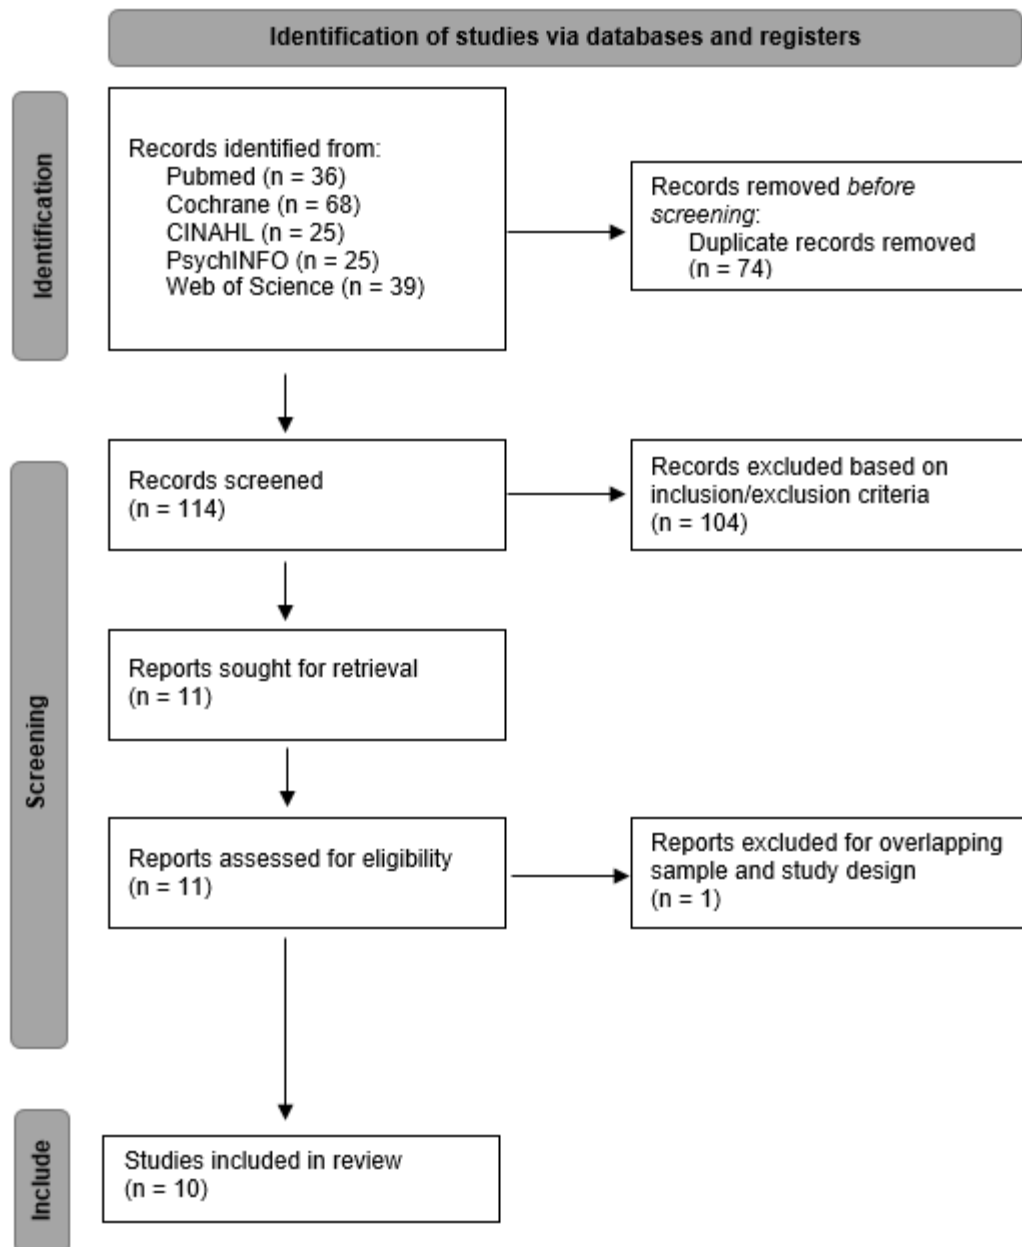

Supplement: appi.ps.202100634.ds001.pdf [file appi.ps.202100634.ds001.pdf]
